# Supplementary material for: Synthesis and antimicrobial activities of chitosan/polypropylene carbonate-based nanoparticles
Source: Royal Society of Chemistry journal article supplement (doi:10.1039/d0ra09257f), 2021-01-01
Supplement: d0ra09257f1.pdf [file d0ra09257f1.pdf]

# ***Synthesis and Antimicrobial Activities of Chitosan/Polypropylene Carbonate-based Nanoparticles***

***Zhilong Quan<sup>1\*</sup>, Chunyang Luo<sup>1</sup>, Bitong Zhu<sup>2</sup>, Chungui Zhao<sup>2</sup>, Mingyi Yang<sup>3</sup>, Magnar  
Bjørås<sup>3</sup>, Kaizheng Zhu<sup>4</sup>, Anna-Lena Kjøniksen<sup>4\*</sup>***

*<sup>1</sup>College of Materials Science & Engineering, Huaqiao University, 361021 Xiamen, P.R China*

*<sup>2</sup>College of Chemical Engineering, Huaqiao University, 361021 Xiamen, P.R China*

*<sup>3</sup>Department of Microbiology, Oslo University Hospital, P.O. Box 4950, N-0424 Oslo, Norway*

*<sup>4</sup>Faculty of Engineering, Østfold University of College, P.O. Box 700, N-1757, Halden, Norway*

**\*Corresponding Authors**

**Email:** [zlquan@hqu.edu.cn](mailto:zlquan@hqu.edu.cn) or [anna.l.kjoniksen@hiof.no](mailto:anna.l.kjoniksen@hiof.no)

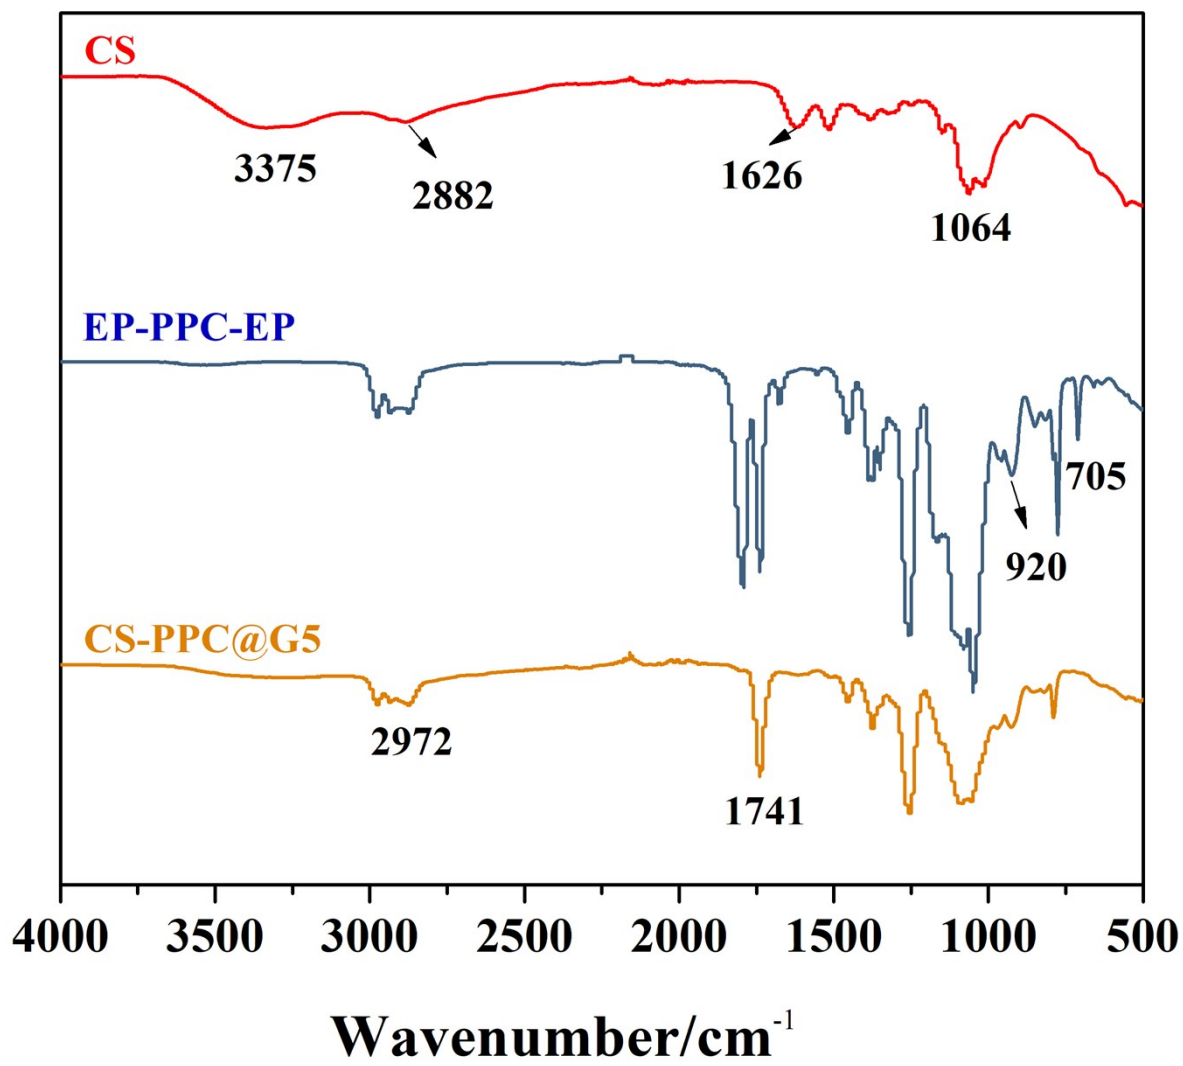

Fig. S1. FTIR Spectra of CS, EP-PPC-EP and G5

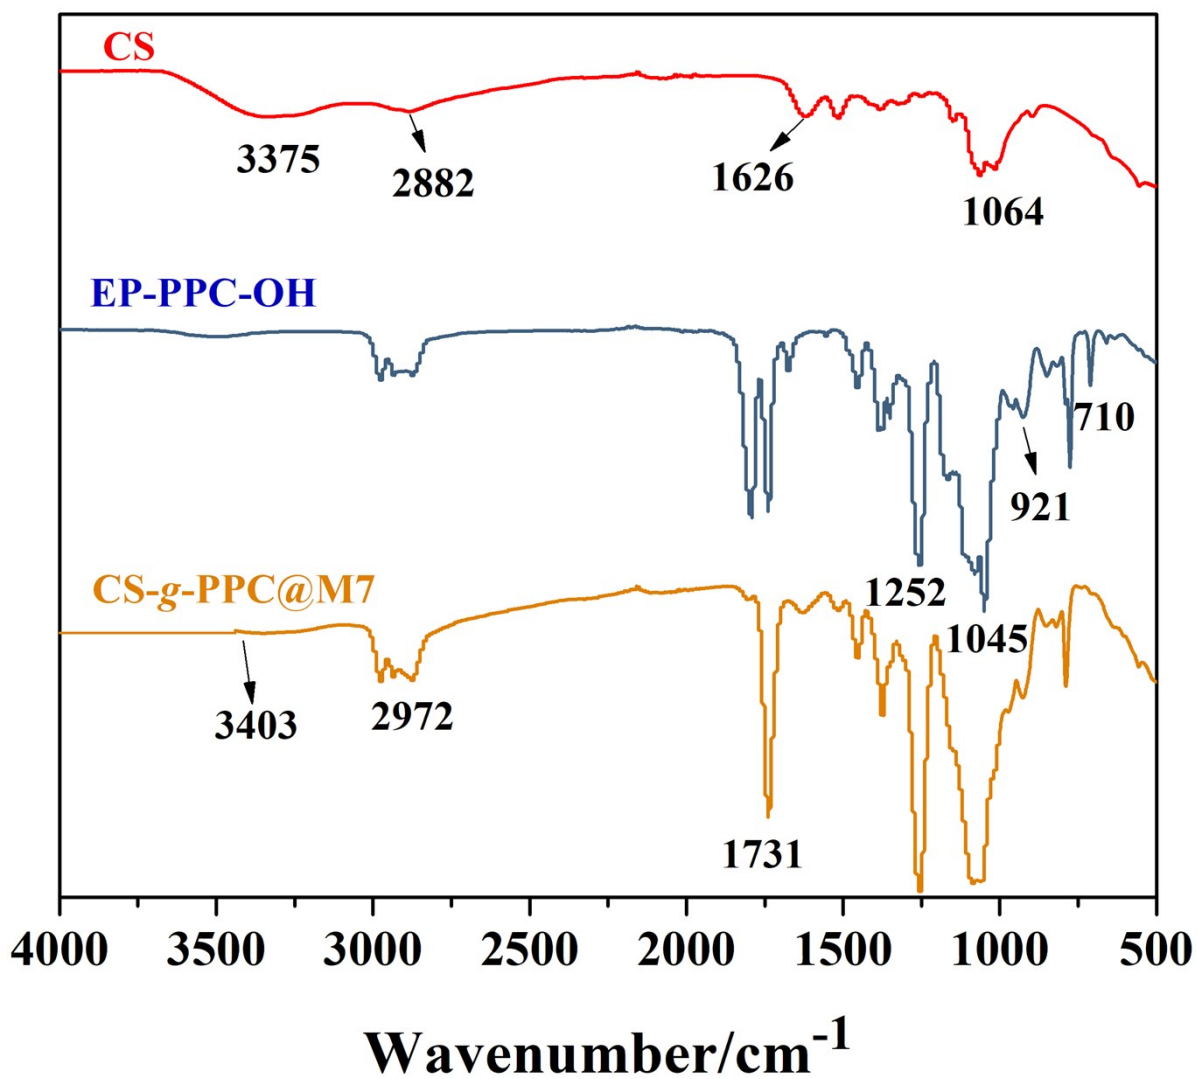

Fig. S2 FTIR of CS, EP-PPC-OH and M7

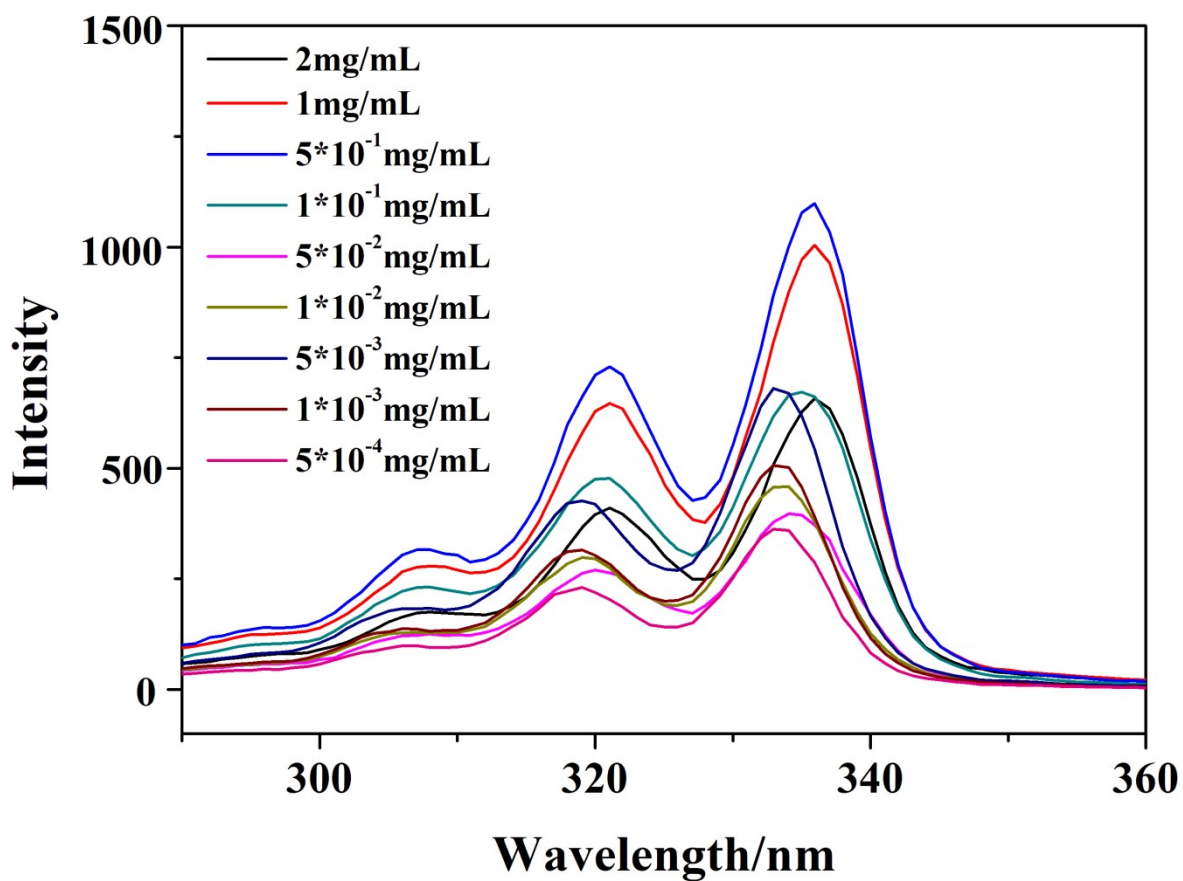

Fig. S3 PL of CS-g-PPC ( $[-EP]/[-NH_2] = 0.1$ ) in different concentration [Pyrene] =  $6.1 \times 10^{-7}$  M

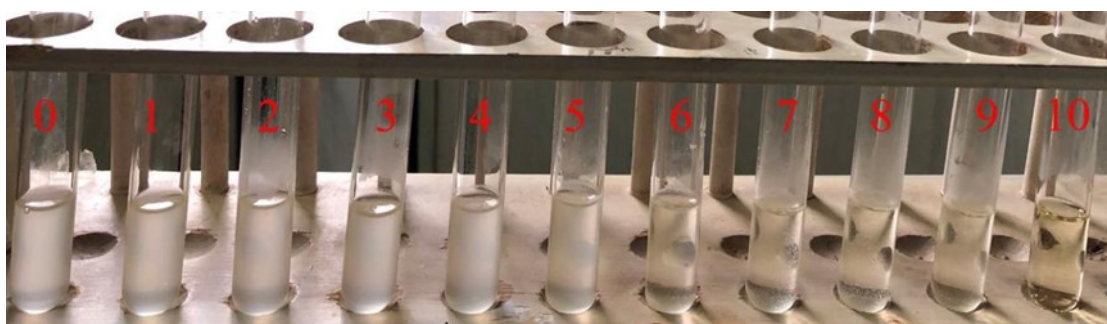

**Fig. S4** Photograph of the MIC result of sample M5 ( $[-EP]/[-NH_2] = 1$ ) against *S.aureus* by tube dilution (turbidimetric) method: where: tube-0 is positive control, tube-10 is the negative control, tube 1~10 are samples of concentration 4  $\mu\text{g/mL}$ , 8  $\mu\text{g/mL}$ , 16  $\mu\text{g/mL}$ , 32  $\mu\text{g/mL}$ , 64  $\mu\text{g/mL}$ , 128  $\mu\text{g/mL}$ , 256  $\mu\text{g/mL}$ , 512  $\mu\text{g/mL}$ , 1024  $\mu\text{g/mL}$  and 2048 $\mu\text{g/mL}$ , respectively.

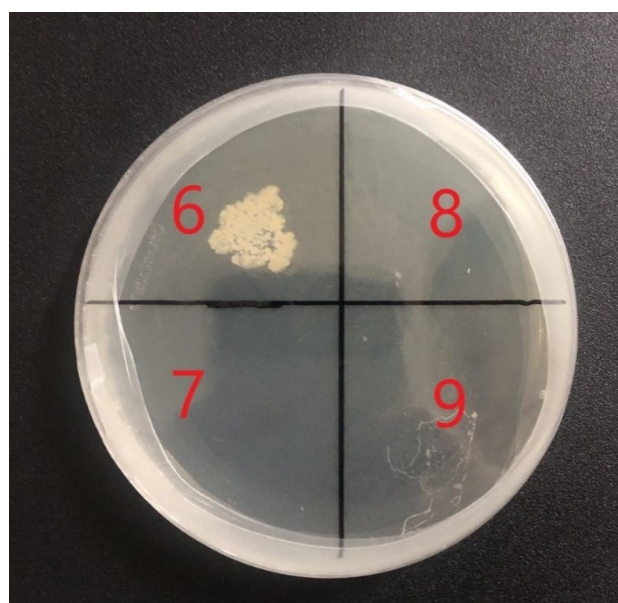

**Fig. S5** Photograph of the MBC result of sample M5 ( $[-EP]/[-NH_2] = 1$ ) against *S.aureus*. Where 6~9 are sub-culture on agar plates with *S.aureus* treated with polymer samples of concentration 128  $\mu\text{g/mL}$ , 256  $\mu\text{g/mL}$ , 512  $\mu\text{g/mL}$  and 1024  $\mu\text{g/mL}$ , respectively.
